# Supplementary figures and images for: Effect of power outages on the use of maternal health services: evidence from Maharashtra, India
Source: PubMed Central journal article supplement — BMJ Glob Health. 2019 Jun 4;4(3):e001372. doi: 10.1136/bmjgh-2018-001372 (PMC6570981; doi:10.1136/bmjgh-2018-001372), 2019-06-04

Appendix Figure 1: Proportion of Deliveries by Location in Maharashtra State, India

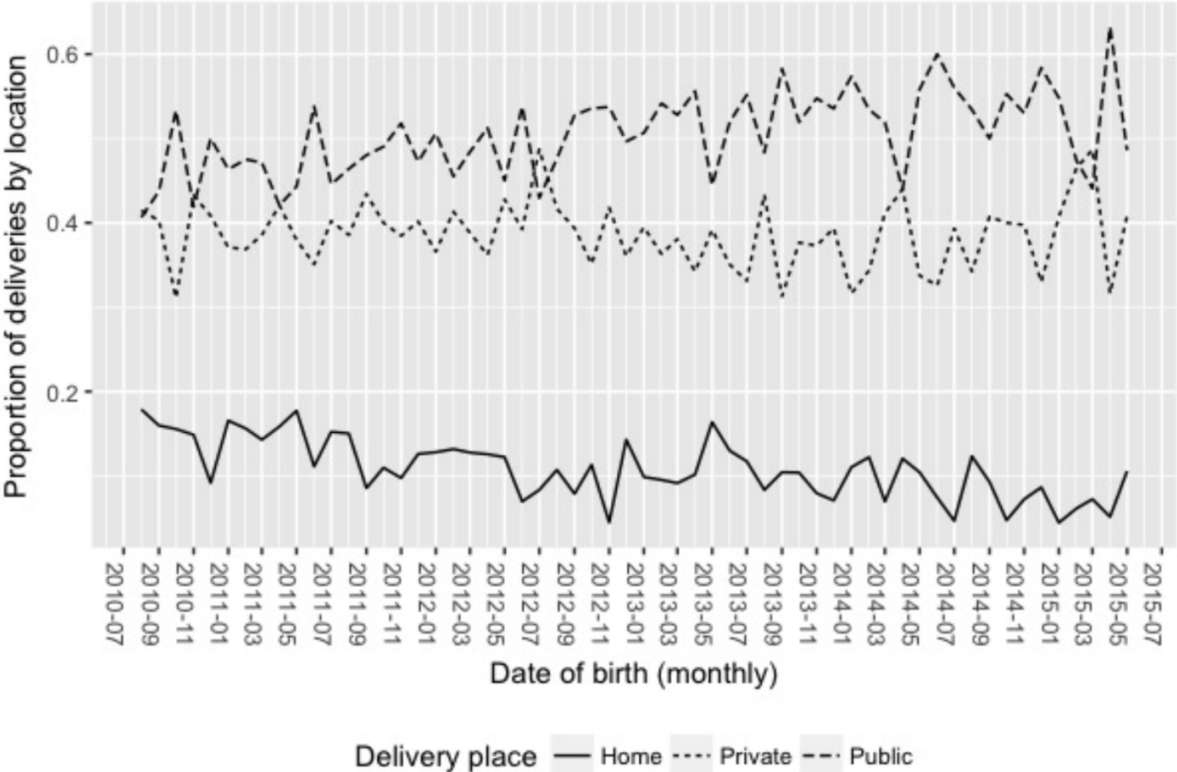

Supplement: bmjgh-2018-001372supp002.pdf [file bmjgh-2018-001372supp002.pdf]

### 2A: Monthly Electricity Outage Frequency

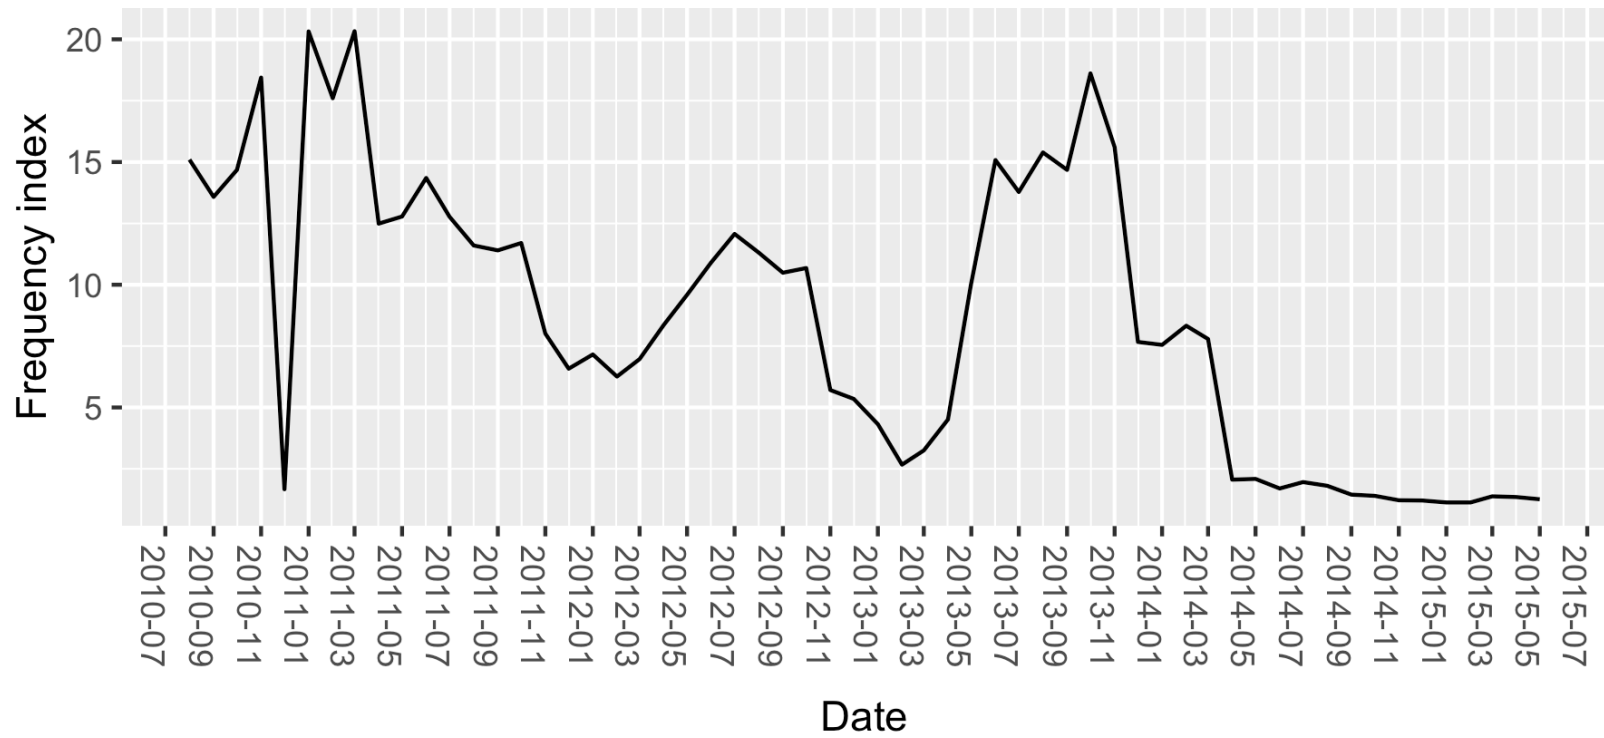

### 2B: Monthly Electricity Outage Duration

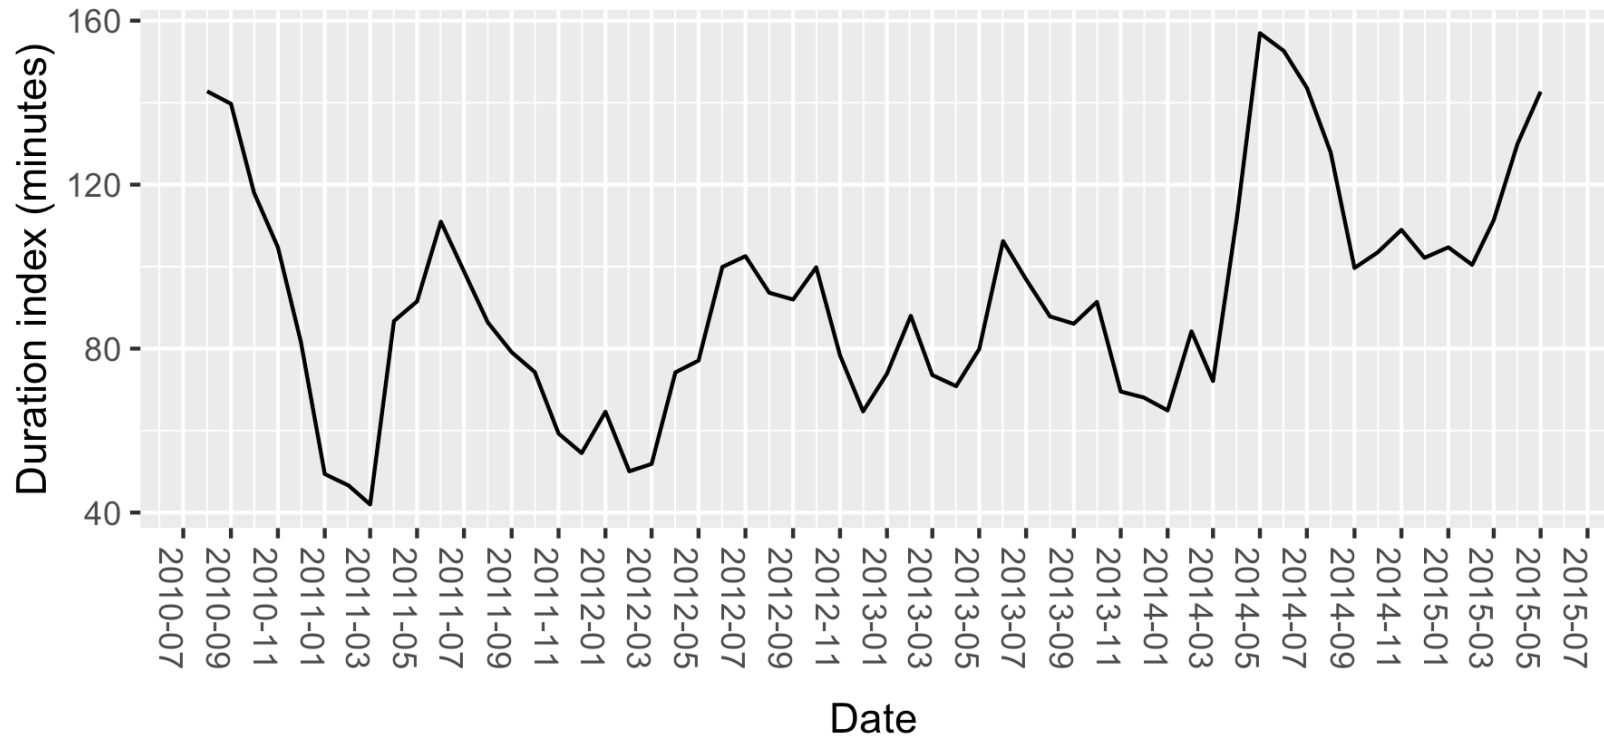

Supplement: bmjgh-2018-001372supp003.pdf [file bmjgh-2018-001372supp003.pdf]
